# Supplementary material for: Elevated leukotriene B4 and 8-isoprostane in exhaled breath condensate from preterm-born infants
Source: Springer Nature journal article supplement (doi:10.1186/s12887-023-04210-y), 2023-08-05
Supplement: MOESM1 [file 25891006]

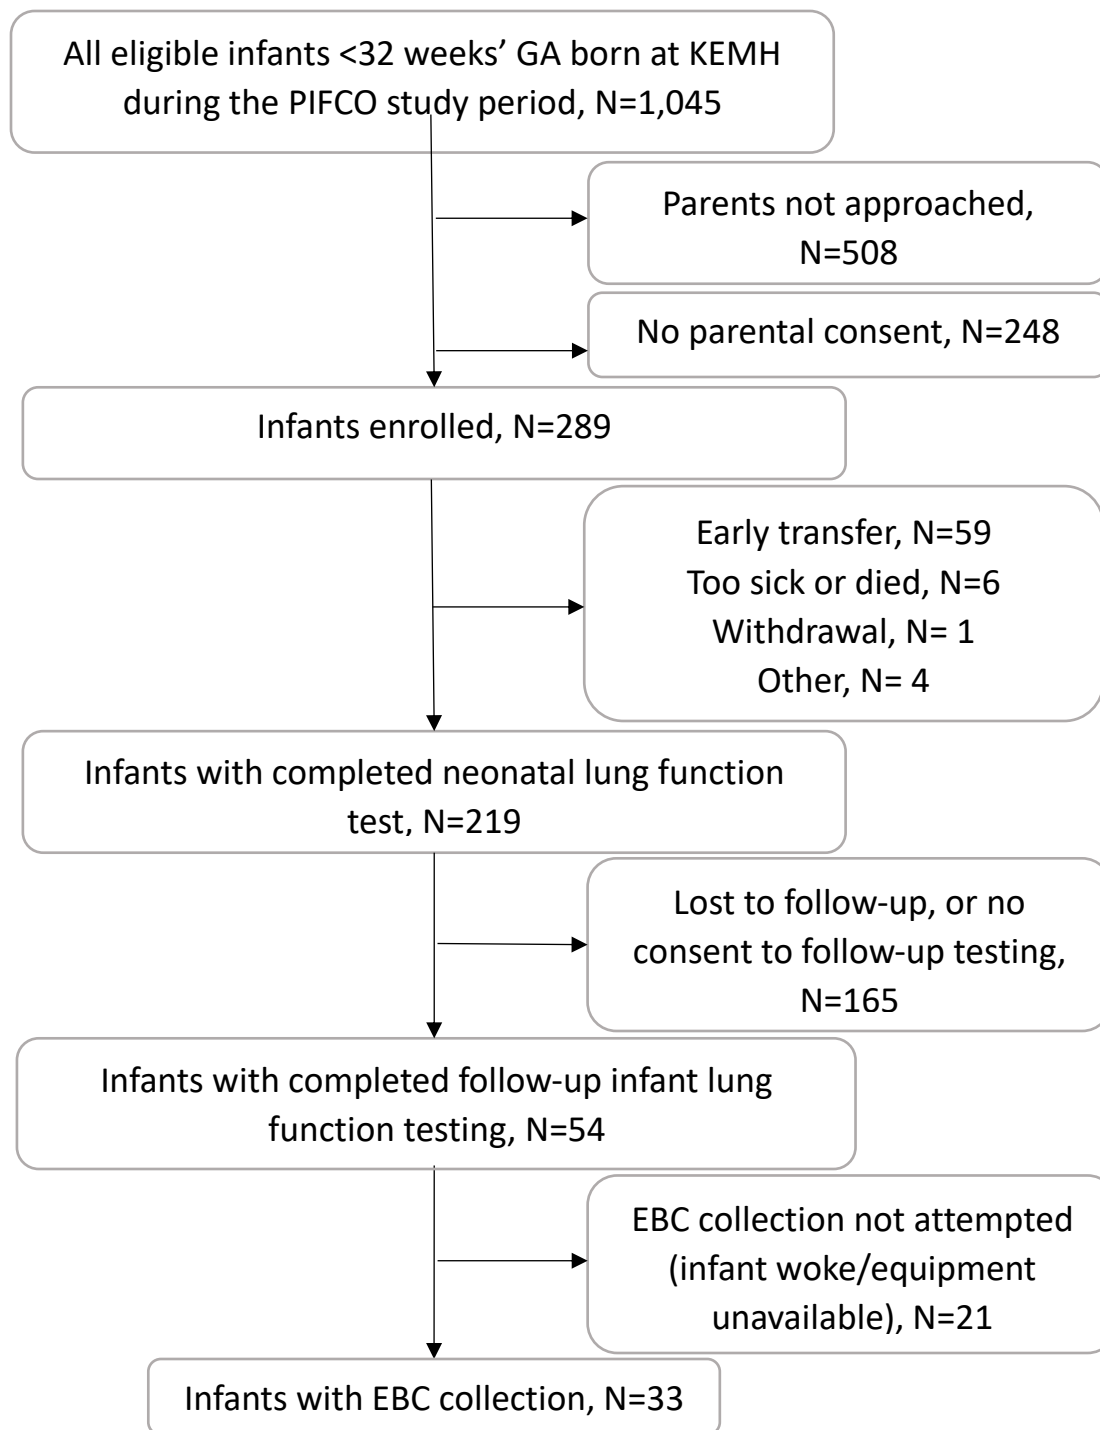

**Supplementary Figure 1.** Flowchart illustrating the recruitment process for participants in the current study as part of the larger Preterm Infant Functional and Clinical Outcomes (PIFCO) follow-up study.
